# Supplementary material for: A novel α-enolase-targeted drug delivery system for high efficacy prostate cancer therapy
Source: Royal Society of Chemistry journal article supplement (doi:10.1039/c8nr03297a), 2018-01-01
Supplement: c8nr03297a1.pdf [file c8nr03297a1.pdf]

Electronic Supplementary Material (ESI) for Nanoscale.

This journal is © The Royal Society of Chemistry 2018

## Supplementary Information

### **A novel $\alpha$ -enolase-targeted drug delivery system for high- efficacy prostate cancer therapy<sup>1</sup>**

*Luyao Wang, Mengke Qu, Shiqi Huang, Yu Fu, Liuqing Yang, Shanshan He, Lin Li,  
Zhirong Zhang, Qing Lin\*, Ling Zhang\**

*Key Laboratory of Drug Targeting and Drug Delivery Systems, Ministry of Education,  
West China School of Pharmacy, College of Polymer Science and Engineering,  
Sichuan University, Chengdu 610041, P. R. China*

\*Corresponding author. Tel: 86-28-85501566. Fax: 86-28-85501615. E-mail address:

qinglin@scu.edu.cn; femcivrogner@gmail.com

---

## **1. Immunofluorescence analysis**

The dissected tumours were first fixed within 4% paraformaldehyde over 48h, and then using 15% and 30% sucrose solution to dehydrate overnight, respectively. The frozen sections of tumours were cut into 8- $\mu$ m-thick, adhered on coated slides, then fixed with 4% paraformaldehyde for 15 min and permeabilized with 0.5% triton-100 for 30 min at room temperature. After washing with PBS, the sections were immersed into 2% bovine serum albumin for 1 h to block nonspecific antibody binding. Next, stained with primary anti- $\alpha$ -enolase antibody (dilution ratio 1:50) at 4°C overnight. The sections were further stained with corresponding Alexa Fluor<sup>®</sup>647 conjugated secondary antibody (dilution ratio 1:200) at room temperature for 1 h. Finally, the slides were immersed in Hoechst 33258 for 10 min to stain the nuclei. The section images were taken using a confocal microscope (Nikon N-SIM, Japan).

---

**Table S1.** Median survival time of PC-3 bearing mice treated with saline and various doxorubicin formulations ( $n = 10$ )

---

| Group           | Median (day)          | Standard derivation | Increased survival time |
|-----------------|-----------------------|---------------------|-------------------------|
| Saline          | 40.0                  | 2.9                 | -                       |
| Dox             | 40.5                  | 4.3                 | 1.25%                   |
| PEG-lipo-Dox    | 46.0 <sup>a</sup>     | 7.5                 | 15.0%                   |
| pHCT74-lipo-Dox | 52.5 <sup>a,b,c</sup> | 7.4                 | 31.3%                   |

---

<sup>a</sup> Compared to saline group,  $p < 0.05$ .

<sup>b</sup> Compared to Dox group,  $p < 0.05$ .

<sup>c</sup> Compared to PEG-lipo-Dox group,  $p < 0.05$ .

## Figures

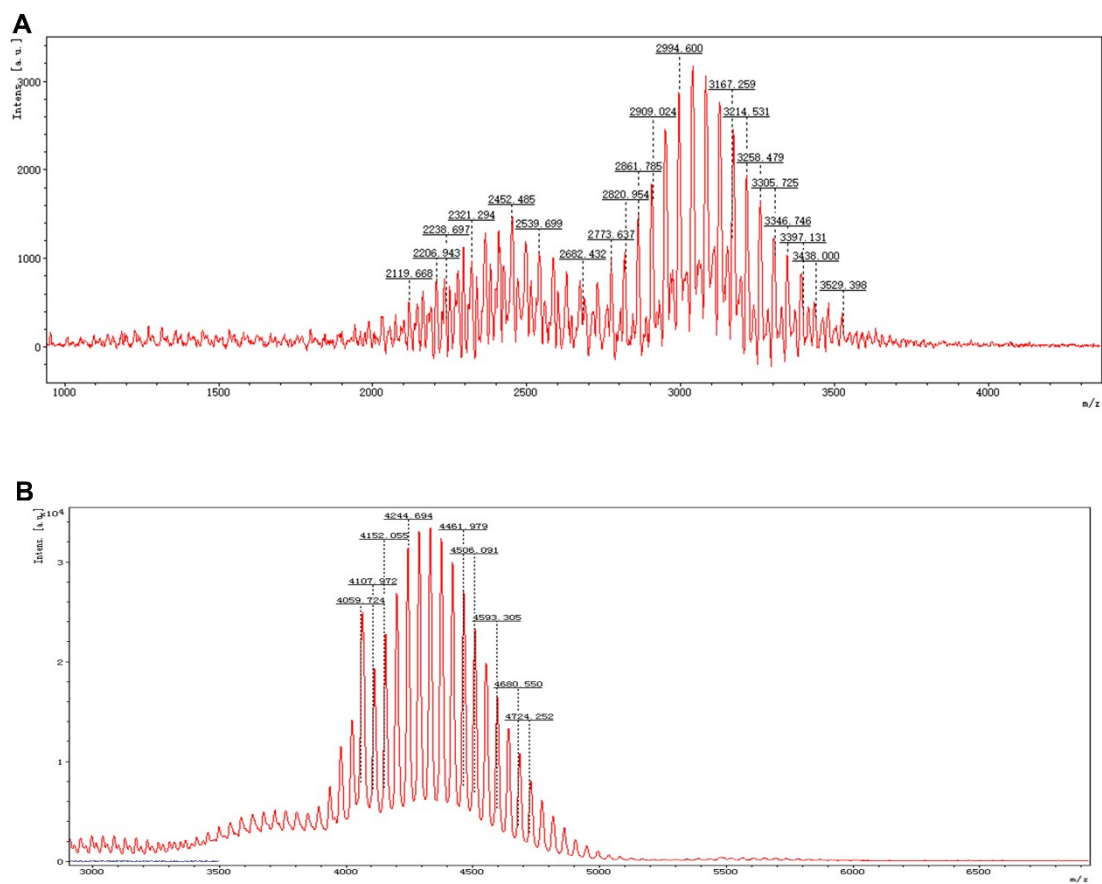

**Fig. S1** The MALDI-TOF mass spectrum **(A)** DSPE-PEG<sub>2000</sub>-NHS. **(B)** DSPE-PEG<sub>2000</sub>-pHCT74.

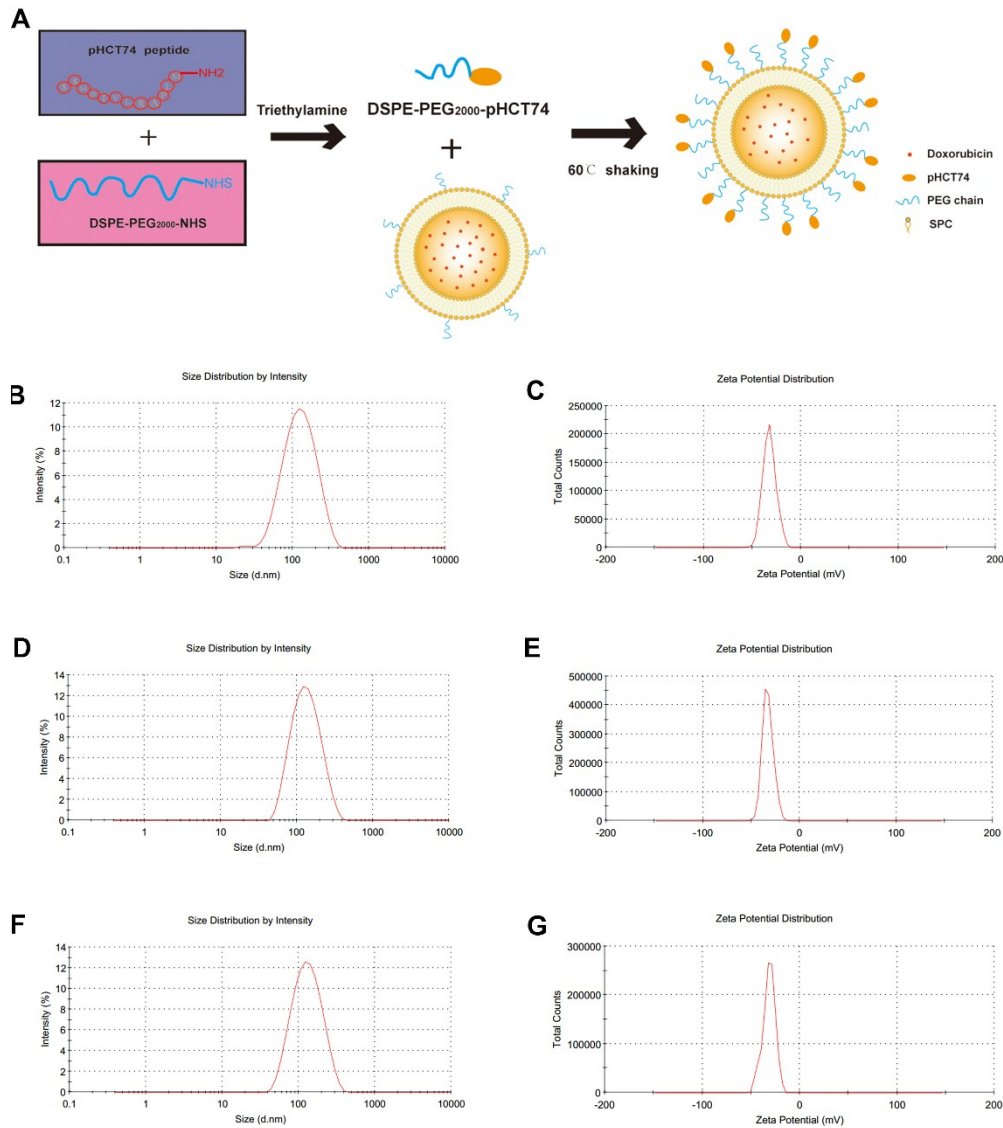

**Fig. S2 Preparation and characterization of liposomes (A) Preparation schematic of pHCT74-Lipo-Dox. (B) Size and (C) Zeta potential distribution of PEG-lipo-Dox. (D) Size and (E) Zeta potential distribution of PEG-lipo-DiD. (F) Size and (G) Zeta potential distribution of pHCT74-lipo-DiD.**

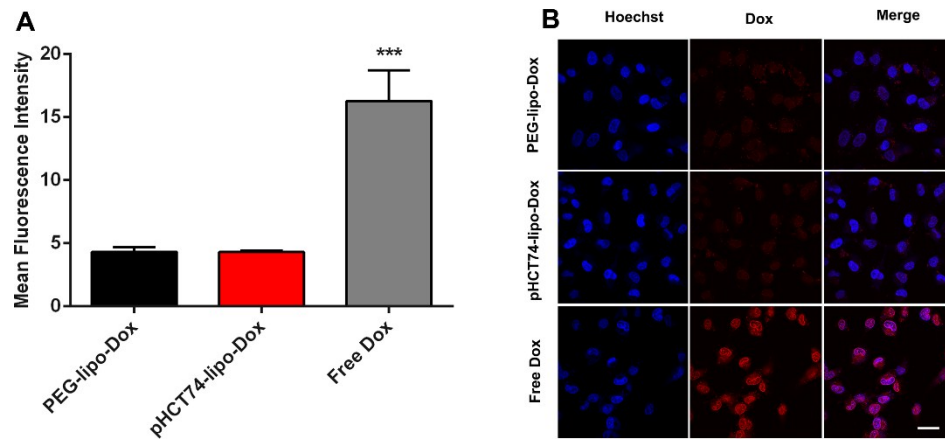

**Fig. S3 Cellular uptake of pHCT74-Lipo-Dox (A)** RWPE-1 cellular uptake of doxorubicin measured by flow cytometer (mean  $\pm$  SD,  $n = 3$ ). **(B)** Confocal images of RWPE-1 cellular uptake of liposomes. Bar indicates 30  $\mu$ m.

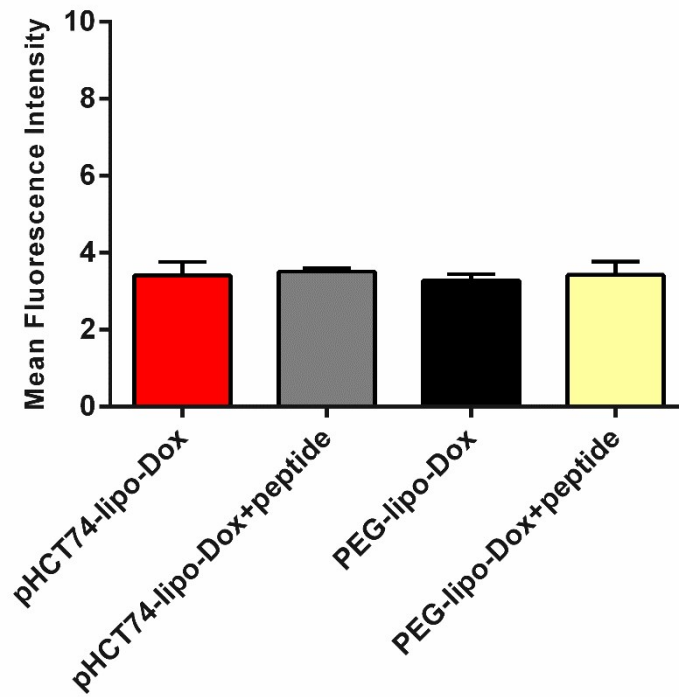

**Fig. S4 The comparative uptake on RWPE-1 cells.** The competitive inhibition of free peptide on doxorubicin uptake by preincubation with 1 mg/mL of free pHCT74 peptide for 1 h before RWPE-1 cells were exposed to the corresponding liposomes.
